# Supplementary material for: Transition from Positive to Neutral in Mutation Fixation along with Continuing Rising Fitness in Thermal Adaptive Evolution
Source: PLoS Genet. 2010 Oct 21;6(10):e1001164. doi: 10.1371/journal.pgen.1001164 (PMC2958811; doi:10.1371/journal.pgen.1001164)
Supplement: Table S2 — Insertions and deletions. The insertions and/or deletions appearing in each evolution period were detected by array-based resequencing and confirmed or determined by Sanger sequencing. The names (Genes), IDs (JWIDs) and genome positions of the genes or noncoding regions (Not ORF) are from GenoBase, as described in Table S1. (0.03 MB XLS) [file pgen.1001164.s005.xls]

## Sheet: del & ins
Evolutionary period	JWID	Gene	Mutation type	Size (bp)	Genome position	Remark
Anc→37L	JW1494	ydeO	Insertion	IS	1585176 – 1585180	IS2
	JW1653	cfa	Insertion	1	1743142 – 1743143	A
	JW1666	pykF	Insertion	IS	1757469 – 1757472	IS5
	JW5670	yhiD	Insertion	IS	3984623 – 3984628	IS2
	Not ORF	ydfC(dicF)/dicB	Insertion	IS	1651273 – 1651277	IS2
Anc→41B	JW2510	hscA	Deletion	81	2655917 – 2655997	-
	JW1666	pykF	Insertion	2	1757680 – 1757684	CCTTT→CCTCTTT
41B→43B	JW0467	ybaL	Deletion	15	501257 – 501271	CAGCGTCTGCTCTTC
	JW3753	rhlB	Deletion	1	3671124 – 3671131	AAAAAAAA→AAAAAAA
	JW4354	yjjK	Deletion	8	4634049 – 4634056	GTTTCACC
	JW2024	rfbA	Insertion	IS	2112338 – 2112339	IS5
43B→45A	JW1982	flu	Deletion	1	2075213	A
	JW3933	oxyR	Deletion	15	3478167 – 3478181	GGTACTCAAGATCAC
	JW5741	rnr	Deletion	1	4413273	T
	Not ORF	yjeH/groS	Deletion	5	4375294 – 4375298	TCACC
45A→45L	JW0055	yabP	Deletion	45	59076 – 59120	-
	JW0468	fsr	Deletion	1	502963 – 502967	GGGGG→GGGG
	JW2778	ygdD	Deletion	1	2940190	C
	JW2811	kduI	Deletion	1	2982121	C
	JW2835	xdhB	Deletion	1	3002131	G
	Not ORF	yfhR/csiE	Deletion	2	2639334 – 2639335	TC
	Not ORF	fklB/cycA	Deletion	1	4434542	A
	JW3179	gltB	Insertion	1	3354813 – 3354818	AAAAAA→AAAAAAA
	JW4220	yjgR	Insertion	1	4493253 – 4493259	CCCCCCC→CCCCCCCC
	Not ORF	ydiY/pfkB	Insertion	1	1807818 – 1807824	AAAAAAA→AAAAAAAA
	Not ORF	ygdH/sdaC	Insertion	1	2926523 – 2926527	AAAAA→AAAAAA
